# Supplementary material for: Enhancement of Mitochondrial Function by the Neurogenic Molecule NSI-189 Accompanies Reversal of Peripheral Neuropathy and Memory Impairment in a Rat Model of Type 2 Diabetes
Source: Hindawi journal article supplement (doi:10.1155/2022/8566970), 2022-07-04
Supplement: f1 [file 8566970.f1.pdf]

|                        | <b>Body weight at onset of treatment (g)</b> | <b>Body weight after 16 weeks of treatment (g)</b> | <b>Blood glucose at onset of treatment (mg/dl)</b> | <b>Blood glucose after 16 weeks of treatment (mg/dl)</b> | <b>Plasma insulin at onset of treatment</b> | <b>Plasma insulin after 16 weeks of treatment (µg/l)</b> |
|------------------------|----------------------------------------------|----------------------------------------------------|----------------------------------------------------|----------------------------------------------------------|---------------------------------------------|----------------------------------------------------------|
| <b>Control+Vehicle</b> | 387.4±3.6                                    | 425.0±4.8                                          | 110.1±3.5                                          | 126.2±3.2                                                | 0.298±0.075                                 | 0.427±0.082                                              |
| <b>ZDF + Vehicle</b>   | 455.3±10.1<br>***                            | 400.7±5.8                                          | 452.4±11.9<br>***                                  | 503.3±24.2<br>***                                        | 1.944±0.472<br>***                          | 0.297±0.078                                              |
| <b>ZDF + NSI-189</b>   | 465.1±10.9<br>***                            | 407.9±10.1                                         | 439.5±13.5<br>***                                  | 499.3±24.1<br>***                                        | 2.016±0.296<br>***                          | 0.271±0.053                                              |
