# Supplementary material for: Enhancement of Mitochondrial Function by the Neurogenic Molecule NSI-189 Accompanies Reversal of Peripheral Neuropathy and Memory Impairment in a Rat Model of Type 2 Diabetes
Source: Hindawi journal article supplement (doi:10.1155/2022/8566970), 2022-07-04

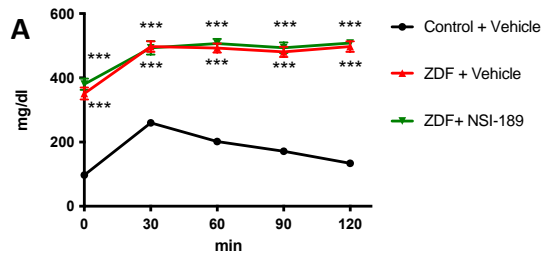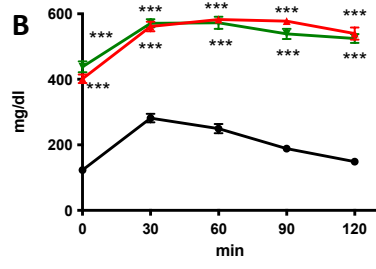

Supplement: f2 [file 8566970.f2.pdf]
